# Supplementary material for: Aluminium complexes containing bidentate and symmetrical tridentate pincer type pyrrolyl ligands: synthesis, reactions and ring opening polymerization
Source: Royal Society of Chemistry journal article supplement (doi:10.1039/c1dt10442j), 2011-01-01
Supplement: c1dt10442j.pdf [file c1dt10442j.pdf]

## supporting information

Aluminum Complexes Containing Bidentate and Symmetrical Tridentate  
Pincer Type Pyrrolyl Ligands: Synthesis, Reactions and Ring Opening  
Polymerization

Wen-Yen Huang,<sup>a</sup> Sheng-Jie Chuang,<sup>a</sup> Nien-Tsu Chunag,<sup>a</sup> Ching-Sheng  
Hsiao,<sup>a</sup> Amitabha Datta,<sup>a</sup> Shau-Jiun Chen,<sup>a</sup> Ching-Han Hu,<sup>a</sup> Jui-Hsien  
Huang,<sup>\*,a</sup> Ting-Yu Lee,<sup>b</sup> Chia-Her Lin<sup>c</sup>

<sup>a</sup>*Department of Chemistry, National Changhua University of Education,  
Changhua, Taiwan 500*

<sup>b</sup>*Department of Applied Chemistry, National Kaohsiung University, Kaohsiung,  
Taiwan 500*

<sup>c</sup>*Department of Chemistry, Chung-Yuan Christian University, Chung-Li 320,  
Taiwan*

*E-mail: juihuang@cc.ncue.edu.tw*

Homonuclear decoupling of  $^1\text{H}$  NMR spectra of complex **7** in

$\text{CDCl}_3$  using 300MHz NMR spectrometer

(1)  $^1\text{H}$ - $^{13}\text{C}$  HSQC 2D NMR spectra of complex **7** in  $\text{C}_6\text{D}_6$  using

300MHz NMR spectrometer.

(2)  $^1\text{H}$ - $^1\text{H}$  NOESY 2D NMR spectrum of complex **7** in  $\text{C}_6\text{D}_6$  using

300MHz NMR spectrometer

(3) Crystal data and structure refinement for complex **2** (second set of crystal

data)

(1)

Homonuclear decoupling of  $^1\text{H}$  NMR spectra of complex **7** in  
 $\text{CDCl}_3$  using 300MHz NMR spectrometer

(2)

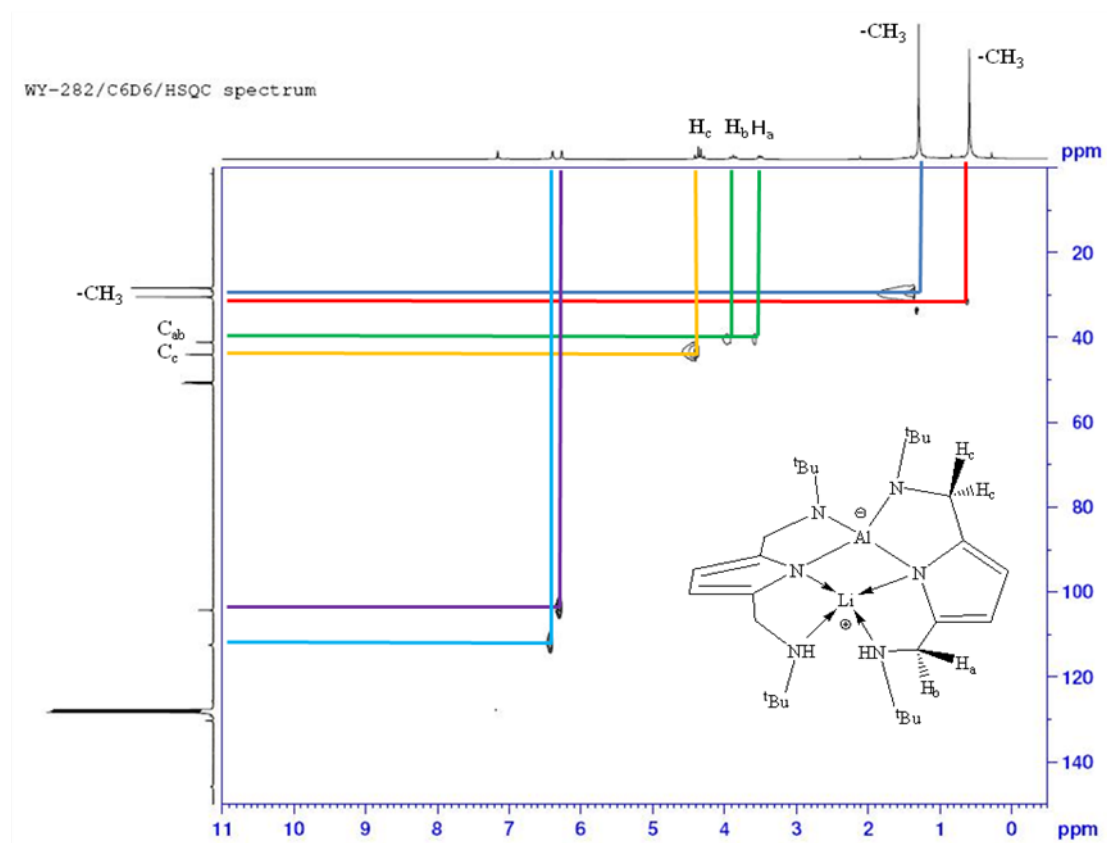

<sup>1</sup>H-<sup>13</sup>C HSQC 2D NMR spectra of complex 7 in C<sub>6</sub>D<sub>6</sub> using 300MHz NMR spectrometer.

(3)

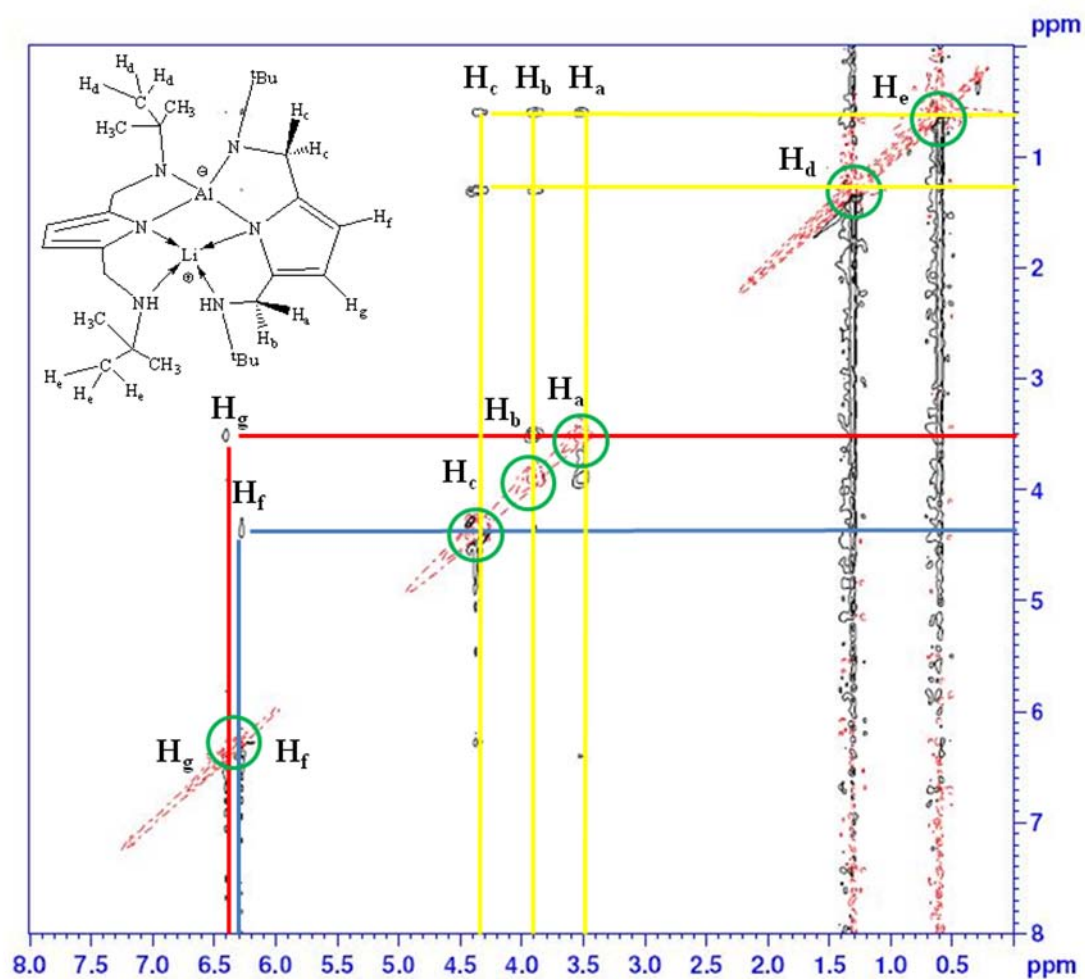

$^1\text{H}$ - $^1\text{H}$  NOESY 2D NMR spectrum of complex **7** in  $\text{C}_6\text{D}_6$  using  
300MHz NMR spectrometer.

(4)

Table 1. Crystal data and structure refinement for complex 2 (second set of crystal data)

|                                   |                                                                                    |
|-----------------------------------|------------------------------------------------------------------------------------|
| Identification code               | wy92m                                                                              |
| Empirical formula                 | C <sub>20</sub> H <sub>34</sub> Al <sub>2</sub> N <sub>4</sub>                     |
| Formula weight                    | 384.47                                                                             |
| Temperature                       | 150(2) K                                                                           |
| Wavelength                        | 0.71073 Å                                                                          |
| Crystal system                    | Monoclinic                                                                         |
| Space group                       | P2(1)/c                                                                            |
| Unit cell dimensions              | a = 9.240(4) Å = 90°.<br>b = 14.081(6) Å = 113.124(18)°.<br>c = 18.041(6) Å = 90°. |
| Volume                            | 2158.7(15) Å <sup>3</sup>                                                          |
| Z                                 | 4                                                                                  |
| Density (calculated)              | 1.183 Mg/m <sup>3</sup>                                                            |
| Absorption coefficient            | 0.146 mm <sup>-1</sup>                                                             |
| F(000)                            | 832                                                                                |
| Crystal size                      | 0.17 x 0.15 x 0.11 mm <sup>3</sup>                                                 |
| Theta range for data collection   | 1.90 to 28.00°.                                                                    |
| Index ranges                      | -11<=h<=12, -18<=k<=18, -23<=l<=20                                                 |
| Reflections collected             | 16742                                                                              |
| Independent reflections           | 5204 [R(int) = 0.1089]                                                             |
| Completeness to theta = 28.00°    | 99.9 %                                                                             |
| Absorption correction             | Semi-empirical from equivalents                                                    |
| Max. and min. transmission        | 0.9841 and 0.9756                                                                  |
| Refinement method                 | Full-matrix least-squares on F <sup>2</sup>                                        |
| Data / restraints / parameters    | 5204 / 0 / 243                                                                     |
| Goodness-of-fit on F <sup>2</sup> | 0.924                                                                              |
| Final R indices [I>2sigma(I)]     | R1 = 0.0548, wR2 = 0.1194                                                          |
| R indices (all data)              | R1 = 0.1439, wR2 = 0.1479                                                          |
| Largest diff. peak and hole       | 0.291 and -0.360 e.Å <sup>-3</sup>                                                 |

Table 2. Atomic coordinates ( $\times 10^4$ ) and equivalent isotropic displacement parameters ( $\text{\AA}^2 \times 10^3$ ) for wy92m.  $U(\text{eq})$  is defined as one third of the trace of the orthogonalized  $U^{\text{ij}}$  tensor.

|       | x        | y       | z       | $U(\text{eq})$ |
|-------|----------|---------|---------|----------------|
| Al(1) | 5097(1)  | 5715(1) | 9479(1) | 30(1)          |
| Al(2) | -728(1)  | 5111(1) | 5546(1) | 38(1)          |
| C(1)  | 6675(3)  | 5339(2) | 8318(2) | 44(1)          |
| C(2)  | 6656(3)  | 4590(3) | 7854(2) | 56(1)          |
| C(3)  | 5645(3)  | 3908(2) | 7963(2) | 46(1)          |
| C(4)  | 5081(3)  | 4281(2) | 8495(2) | 31(1)          |
| C(5)  | 4007(4)  | 3908(2) | 8867(2) | 41(1)          |
| C(6)  | 1909(3)  | 4824(2) | 9121(2) | 30(1)          |
| C(7)  | 1244(3)  | 5134(2) | 8242(2) | 43(1)          |
| C(8)  | 1093(3)  | 3927(2) | 9229(2) | 42(1)          |
| C(9)  | 1634(3)  | 5626(2) | 9613(2) | 35(1)          |
| C(10) | 4635(3)  | 7054(2) | 9257(2) | 50(1)          |
| C(11) | -845(4)  | 3465(3) | 6590(2) | 56(1)          |
| C(12) | 194(5)   | 2780(3) | 6960(2) | 77(1)          |
| C(13) | 1577(5)  | 2964(2) | 6831(2) | 61(1)          |
| C(14) | 1315(4)  | 3783(2) | 6388(2) | 37(1)          |
| C(15) | 2308(4)  | 4336(3) | 6071(2) | 66(1)          |
| C(16) | 2371(3)  | 6105(2) | 5935(2) | 42(1)          |
| C(17) | 2661(4)  | 6219(3) | 6828(2) | 72(1)          |
| C(18) | 3929(3)  | 6075(3) | 5827(2) | 62(1)          |
| C(19) | 1442(3)  | 6967(2) | 5497(2) | 42(1)          |
| C(20) | -1949(4) | 6055(3) | 5843(3) | 75(1)          |
| N(1)  | 5713(2)  | 5171(2) | 8725(1) | 33(1)          |
| N(2)  | 3681(2)  | 4644(1) | 9402(1) | 28(1)          |
| N(3)  | -189(3)  | 4096(2) | 6229(1) | 38(1)          |
| N(4)  | 1437(2)  | 5204(2) | 5598(1) | 37(1)          |

Table 3. Bond lengths [Å] and angles [°] for wy92m.

---

|               |            |
|---------------|------------|
| Al(1)-N(1)    | 1.836(2)   |
| Al(1)-C(10)   | 1.940(3)   |
| Al(1)-N(2)#1  | 1.955(2)   |
| Al(1)-N(2)    | 1.965(2)   |
| Al(1)-Al(1)#1 | 2.8086(18) |
| Al(2)-N(3)    | 1.825(3)   |
| Al(2)-C(20)   | 1.951(3)   |
| Al(2)-N(4)#2  | 1.954(3)   |
| Al(2)-N(4)    | 1.970(2)   |
| Al(2)-Al(2)#2 | 2.8037(19) |
| C(1)-C(2)     | 1.342(4)   |
| C(1)-N(1)     | 1.377(3)   |
| C(1)-H(1)     | 0.9500     |
| C(2)-C(3)     | 1.406(4)   |
| C(2)-H(2)     | 0.9500     |
| C(3)-C(4)     | 1.364(4)   |
| C(3)-H(3)     | 0.9500     |
| C(4)-N(1)     | 1.375(3)   |
| C(4)-C(5)     | 1.496(4)   |
| C(5)-N(2)     | 1.524(3)   |
| C(5)-H(5A)    | 0.9900     |
| C(5)-H(5B)    | 0.9900     |
| C(6)-C(9)     | 1.519(4)   |
| C(6)-C(8)     | 1.522(4)   |
| C(6)-C(7)     | 1.522(4)   |
| C(6)-N(2)     | 1.533(3)   |
| C(7)-H(7A)    | 0.9800     |
| C(7)-H(7B)    | 0.9800     |
| C(7)-H(7C)    | 0.9800     |
| C(8)-H(8A)    | 0.9800     |
| C(8)-H(8B)    | 0.9800     |
| C(8)-H(8C)    | 0.9800     |
| C(9)-H(9A)    | 0.9800     |
| C(9)-H(9B)    | 0.9800     |
| C(9)-H(9C)    | 0.9800     |
| C(10)-H(10A)  | 0.9800     |



|                    |            |
|--------------------|------------|
| C(10)-H(10B)       | 0.9800     |
| C(10)-H(10C)       | 0.9800     |
| C(11)-C(12)        | 1.340(5)   |
| C(11)-N(3)         | 1.375(4)   |
| C(11)-H(11)        | 0.9500     |
| C(12)-C(13)        | 1.410(5)   |
| C(12)-H(12)        | 0.9500     |
| C(13)-C(14)        | 1.369(4)   |
| C(13)-H(13)        | 0.9500     |
| C(14)-N(3)         | 1.376(4)   |
| C(14)-C(15)        | 1.479(4)   |
| C(15)-N(4)         | 1.527(4)   |
| C(15)-H(15A)       | 0.9900     |
| C(15)-H(15B)       | 0.9900     |
| C(16)-C(19)        | 1.517(4)   |
| C(16)-N(4)         | 1.521(4)   |
| C(16)-C(18)        | 1.527(4)   |
| C(16)-C(17)        | 1.535(4)   |
| C(17)-H(17A)       | 0.9800     |
| C(17)-H(17B)       | 0.9800     |
| C(17)-H(17C)       | 0.9800     |
| C(18)-H(18A)       | 0.9800     |
| C(18)-H(18B)       | 0.9800     |
| C(18)-H(18C)       | 0.9800     |
| C(19)-H(19A)       | 0.9800     |
| C(19)-H(19B)       | 0.9800     |
| C(19)-H(19C)       | 0.9800     |
| C(20)-H(20A)       | 0.9800     |
| C(20)-H(20B)       | 0.9800     |
| C(20)-H(20C)       | 0.9800     |
| N(2)-Al(1)#1       | 1.954(2)   |
| N(4)-Al(2)#2       | 1.954(3)   |
|                    |            |
| N(1)-Al(1)-C(10)   | 111.11(13) |
| N(1)-Al(1)-N(2)#1  | 115.86(10) |
| C(10)-Al(1)-N(2)#1 | 117.08(12) |
| N(1)-Al(1)-N(2)    | 91.09(10)  |
| C(10)-Al(1)-N(2)   | 130.17(12) |

|                      |            |
|----------------------|------------|
| N(2)#1-Al(1)-N(2)    | 88.47(9)   |
| N(1)-Al(1)-Al(1)#1   | 108.47(9)  |
| C(10)-Al(1)-Al(1)#1  | 140.19(11) |
| N(2)#1-Al(1)-Al(1)#1 | 44.39(6)   |
| N(2)-Al(1)-Al(1)#1   | 44.08(7)   |
| N(3)-Al(2)-C(20)     | 112.42(15) |
| N(3)-Al(2)-N(4)#2    | 115.13(11) |
| C(20)-Al(2)-N(4)#2   | 117.05(15) |
| N(3)-Al(2)-N(4)      | 90.99(11)  |
| C(20)-Al(2)-N(4)     | 128.92(14) |
| N(4)#2-Al(2)-N(4)    | 88.80(10)  |
| N(3)-Al(2)-Al(2)#2   | 107.95(9)  |
| C(20)-Al(2)-Al(2)#2  | 139.33(14) |
| N(4)#2-Al(2)-Al(2)#2 | 44.62(7)   |
| N(4)-Al(2)-Al(2)#2   | 44.18(7)   |
| C(2)-C(1)-N(1)       | 110.1(3)   |
| C(2)-C(1)-H(1)       | 124.9      |
| N(1)-C(1)-H(1)       | 124.9      |
| C(1)-C(2)-C(3)       | 107.3(3)   |
| C(1)-C(2)-H(2)       | 126.4      |
| C(3)-C(2)-H(2)       | 126.4      |
| C(4)-C(3)-C(2)       | 107.0(3)   |
| C(4)-C(3)-H(3)       | 126.5      |
| C(2)-C(3)-H(3)       | 126.5      |
| C(3)-C(4)-N(1)       | 109.3(3)   |
| C(3)-C(4)-C(5)       | 133.2(3)   |
| N(1)-C(4)-C(5)       | 117.5(2)   |
| C(4)-C(5)-N(2)       | 112.1(2)   |
| C(4)-C(5)-H(5A)      | 109.2      |
| N(2)-C(5)-H(5A)      | 109.2      |
| C(4)-C(5)-H(5B)      | 109.2      |
| N(2)-C(5)-H(5B)      | 109.2      |
| H(5A)-C(5)-H(5B)     | 107.9      |
| C(9)-C(6)-C(8)       | 109.7(2)   |
| C(9)-C(6)-C(7)       | 107.6(2)   |
| C(8)-C(6)-C(7)       | 110.8(2)   |
| C(9)-C(6)-N(2)       | 109.4(2)   |
| C(8)-C(6)-N(2)       | 109.8(2)   |

|                     |          |
|---------------------|----------|
| C(7)-C(6)-N(2)      | 109.5(2) |
| C(6)-C(7)-H(7A)     | 109.5    |
| C(6)-C(7)-H(7B)     | 109.5    |
| H(7A)-C(7)-H(7B)    | 109.5    |
| C(6)-C(7)-H(7C)     | 109.5    |
| H(7A)-C(7)-H(7C)    | 109.5    |
| H(7B)-C(7)-H(7C)    | 109.5    |
| C(6)-C(8)-H(8A)     | 109.5    |
| C(6)-C(8)-H(8B)     | 109.5    |
| H(8A)-C(8)-H(8B)    | 109.5    |
| C(6)-C(8)-H(8C)     | 109.5    |
| H(8A)-C(8)-H(8C)    | 109.5    |
| H(8B)-C(8)-H(8C)    | 109.5    |
| C(6)-C(9)-H(9A)     | 109.5    |
| C(6)-C(9)-H(9B)     | 109.5    |
| H(9A)-C(9)-H(9B)    | 109.5    |
| C(6)-C(9)-H(9C)     | 109.5    |
| H(9A)-C(9)-H(9C)    | 109.5    |
| H(9B)-C(9)-H(9C)    | 109.5    |
| Al(1)-C(10)-H(10A)  | 109.5    |
| Al(1)-C(10)-H(10B)  | 109.5    |
| H(10A)-C(10)-H(10B) | 109.5    |
| Al(1)-C(10)-H(10C)  | 109.5    |
| H(10A)-C(10)-H(10C) | 109.5    |
| H(10B)-C(10)-H(10C) | 109.5    |
| C(12)-C(11)-N(3)    | 109.8(3) |
| C(12)-C(11)-H(11)   | 125.1    |
| N(3)-C(11)-H(11)    | 125.1    |
| C(11)-C(12)-C(13)   | 107.7(3) |
| C(11)-C(12)-H(12)   | 126.1    |
| C(13)-C(12)-H(12)   | 126.1    |
| C(14)-C(13)-C(12)   | 106.7(3) |
| C(14)-C(13)-H(13)   | 126.7    |
| C(12)-C(13)-H(13)   | 126.7    |
| C(13)-C(14)-N(3)    | 108.9(3) |
| C(13)-C(14)-C(15)   | 132.4(3) |
| N(3)-C(14)-C(15)    | 118.7(2) |
| C(14)-C(15)-N(4)    | 111.5(2) |

|                     |            |
|---------------------|------------|
| C(14)-C(15)-H(15A)  | 109.3      |
| N(4)-C(15)-H(15A)   | 109.3      |
| C(14)-C(15)-H(15B)  | 109.3      |
| N(4)-C(15)-H(15B)   | 109.3      |
| H(15A)-C(15)-H(15B) | 108.0      |
| C(19)-C(16)-N(4)    | 110.1(2)   |
| C(19)-C(16)-C(18)   | 109.0(2)   |
| N(4)-C(16)-C(18)    | 110.0(3)   |
| C(19)-C(16)-C(17)   | 107.0(3)   |
| N(4)-C(16)-C(17)    | 110.2(2)   |
| C(18)-C(16)-C(17)   | 110.6(2)   |
| C(16)-C(17)-H(17A)  | 109.5      |
| C(16)-C(17)-H(17B)  | 109.5      |
| H(17A)-C(17)-H(17B) | 109.5      |
| C(16)-C(17)-H(17C)  | 109.5      |
| H(17A)-C(17)-H(17C) | 109.5      |
| H(17B)-C(17)-H(17C) | 109.5      |
| C(16)-C(18)-H(18A)  | 109.5      |
| C(16)-C(18)-H(18B)  | 109.5      |
| H(18A)-C(18)-H(18B) | 109.5      |
| C(16)-C(18)-H(18C)  | 109.5      |
| H(18A)-C(18)-H(18C) | 109.5      |
| H(18B)-C(18)-H(18C) | 109.5      |
| C(16)-C(19)-H(19A)  | 109.5      |
| C(16)-C(19)-H(19B)  | 109.5      |
| H(19A)-C(19)-H(19B) | 109.5      |
| C(16)-C(19)-H(19C)  | 109.5      |
| H(19A)-C(19)-H(19C) | 109.5      |
| H(19B)-C(19)-H(19C) | 109.5      |
| Al(2)-C(20)-H(20A)  | 109.5      |
| Al(2)-C(20)-H(20B)  | 109.5      |
| H(20A)-C(20)-H(20B) | 109.5      |
| Al(2)-C(20)-H(20C)  | 109.5      |
| H(20A)-C(20)-H(20C) | 109.5      |
| H(20B)-C(20)-H(20C) | 109.5      |
| C(4)-N(1)-C(1)      | 106.4(2)   |
| C(4)-N(1)-Al(1)     | 112.66(17) |
| C(1)-N(1)-Al(1)     | 140.9(2)   |

|                    |            |
|--------------------|------------|
| C(5)-N(2)-C(6)     | 110.7(2)   |
| C(5)-N(2)-Al(1)#1  | 107.48(17) |
| C(6)-N(2)-Al(1)#1  | 119.56(15) |
| C(5)-N(2)-Al(1)    | 105.95(15) |
| C(6)-N(2)-Al(1)    | 119.44(16) |
| Al(1)#1-N(2)-Al(1) | 91.54(9)   |
| C(11)-N(3)-C(14)   | 106.9(3)   |
| C(11)-N(3)-Al(2)   | 140.6(3)   |
| C(14)-N(3)-Al(2)   | 112.12(17) |
| C(16)-N(4)-C(15)   | 110.7(2)   |
| C(16)-N(4)-Al(2)#2 | 120.93(16) |
| C(15)-N(4)-Al(2)#2 | 107.0(2)   |
| C(16)-N(4)-Al(2)   | 118.72(17) |
| C(15)-N(4)-Al(2)   | 106.00(17) |
| Al(2)#2-N(4)-Al(2) | 91.20(10)  |

---

Symmetry transformations used to generate equivalent atoms:

#1 -x+1,-y+1,-z+2    #2 -x,-y+1,-z+1

Table 4. Anisotropic displacement parameters ( $\text{\AA}^2 \times 10^3$ ) for wy92m. The anisotropic displacement factor exponent takes the form:  $-2\pi^2 [h^2 a^{*2} U^{11} + \dots + 2 h k a^* b^* U^{12}]$

|       | U <sup>11</sup> | U <sup>22</sup> | U <sup>33</sup> | U <sup>23</sup> | U <sup>13</sup> | U <sup>12</sup> |
|-------|-----------------|-----------------|-----------------|-----------------|-----------------|-----------------|
| Al(1) | 27(1)           | 24(1)           | 39(1)           | 1(1)            | 14(1)           | 1(1)            |
| Al(2) | 32(1)           | 29(1)           | 61(1)           | 3(1)            | 26(1)           | -1(1)           |
| C(1)  | 30(2)           | 71(2)           | 32(2)           | 12(2)           | 13(1)           | 0(2)            |
| C(2)  | 36(2)           | 104(3)          | 32(2)           | 1(2)            | 18(2)           | 7(2)            |
| C(3)  | 39(2)           | 63(2)           | 36(2)           | -8(2)           | 14(1)           | 10(2)           |
| C(4)  | 29(1)           | 37(2)           | 26(1)           | 5(1)            | 9(1)            | 13(1)           |
| C(5)  | 60(2)           | 26(2)           | 49(2)           | -2(1)           | 34(2)           | 6(2)            |
| C(6)  | 25(1)           | 36(2)           | 28(1)           | 1(1)            | 9(1)            | -4(1)           |
| C(7)  | 41(2)           | 48(2)           | 35(2)           | 1(2)            | 10(1)           | -9(2)           |
| C(8)  | 34(2)           | 45(2)           | 47(2)           | 3(2)            | 17(1)           | -8(2)           |
| C(9)  | 28(2)           | 42(2)           | 35(2)           | -1(1)           | 12(1)           | 6(1)            |
| C(10) | 39(2)           | 33(2)           | 68(2)           | 7(2)            | 10(2)           | 2(2)            |
| C(11) | 75(3)           | 64(2)           | 30(2)           | -10(2)          | 22(2)           | -45(2)          |
| C(12) | 100(3)          | 61(3)           | 43(2)           | 13(2)           | 0(2)            | -51(3)          |
| C(13) | 79(3)           | 36(2)           | 43(2)           | 4(2)            | -4(2)           | -9(2)           |
| C(14) | 56(2)           | 24(2)           | 26(2)           | 2(1)            | 12(1)           | -2(2)           |
| C(15) | 68(2)           | 67(2)           | 78(3)           | 47(2)           | 46(2)           | 32(2)           |
| C(16) | 34(2)           | 58(2)           | 33(2)           | 13(2)           | 11(1)           | -11(2)          |
| C(17) | 55(2)           | 118(3)          | 36(2)           | 17(2)           | 9(2)            | -27(2)          |
| C(18) | 34(2)           | 88(3)           | 61(2)           | 26(2)           | 16(2)           | -11(2)          |
| C(19) | 53(2)           | 35(2)           | 38(2)           | -5(2)           | 18(2)           | -15(2)          |
| C(20) | 53(2)           | 54(2)           | 128(4)          | -19(2)          | 48(2)           | -2(2)           |
| N(1)  | 27(1)           | 43(2)           | 30(1)           | 11(1)           | 12(1)           | 4(1)            |
| N(2)  | 27(1)           | 25(1)           | 35(1)           | -7(1)           | 16(1)           | -3(1)           |
| N(3)  | 52(2)           | 36(1)           | 32(1)           | -3(1)           | 22(1)           | -13(1)          |
| N(4)  | 30(1)           | 35(1)           | 50(2)           | 21(1)           | 18(1)           | 7(1)            |
